# Supplementary material for: Preparation of novel pigskin-derived carbon sheets and their low-temperature activation-induced high capacitive performance
Source: Royal Society of Chemistry journal article supplement (doi:10.1039/c4ra08055f), 2014-01-01
Supplement: c4ra08055f1.pdf [file c4ra08055f1.pdf]

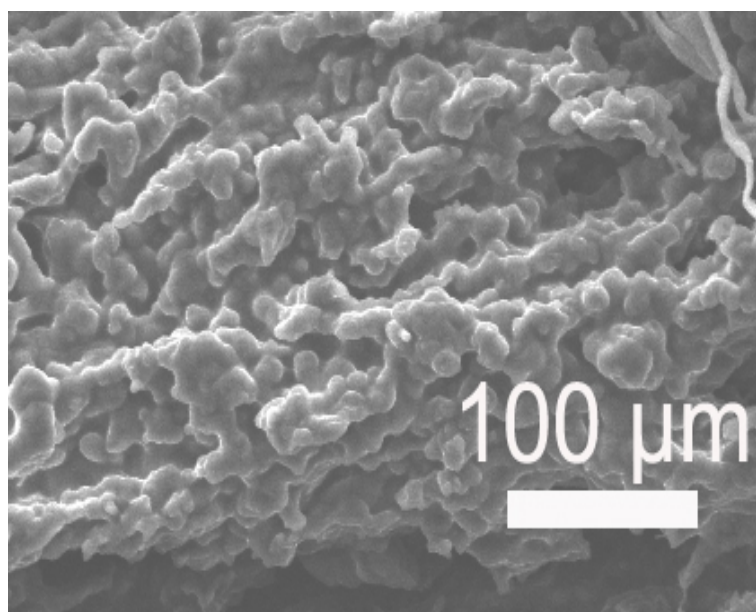

**Fig. S1.** Enlarged SEM image of the surface of raw pigskin.

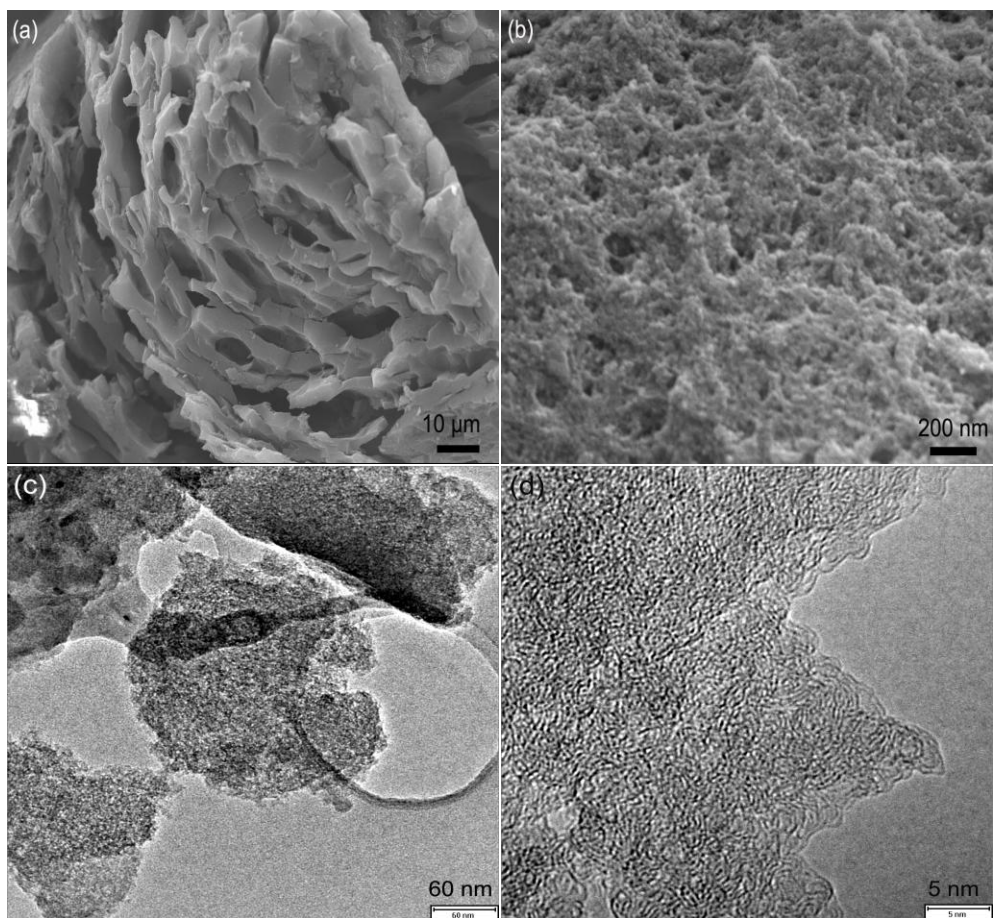

**Fig. S2.** SEM (a, b) and HRTEM images (c, d) of pigskin-derived carbon activated at 800 °C.

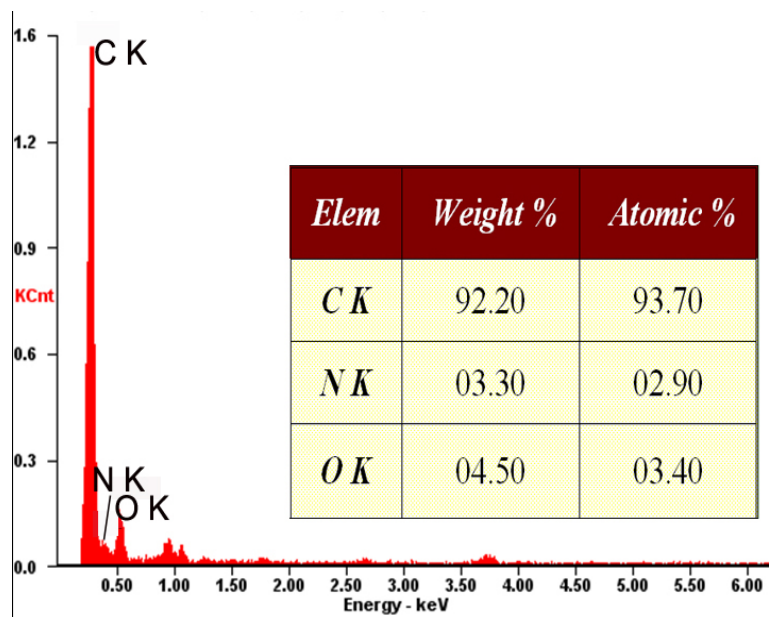

**Fig. S3.** EDX spectra of pigskin-derived carbon activated at 600 °C.

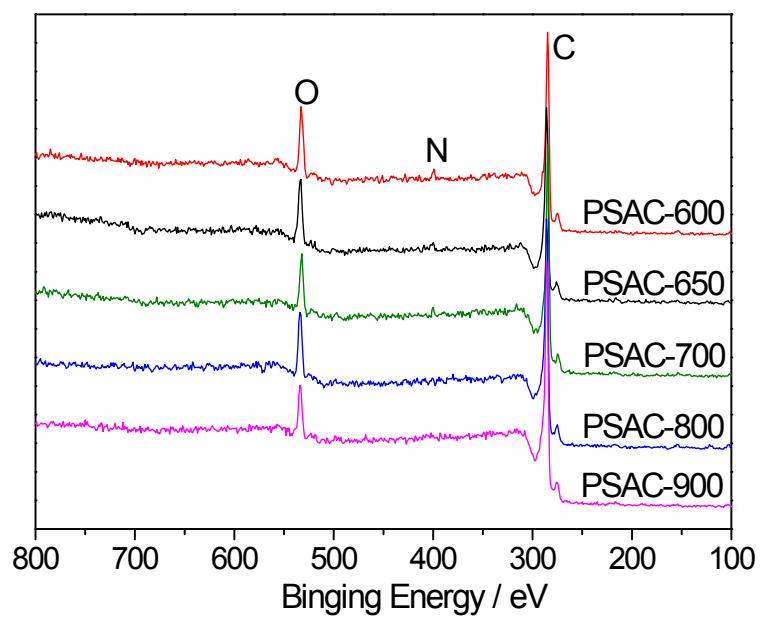

**Fig. S4.** XPS spectra of pigskin-derived carbons activated at different temperatures.

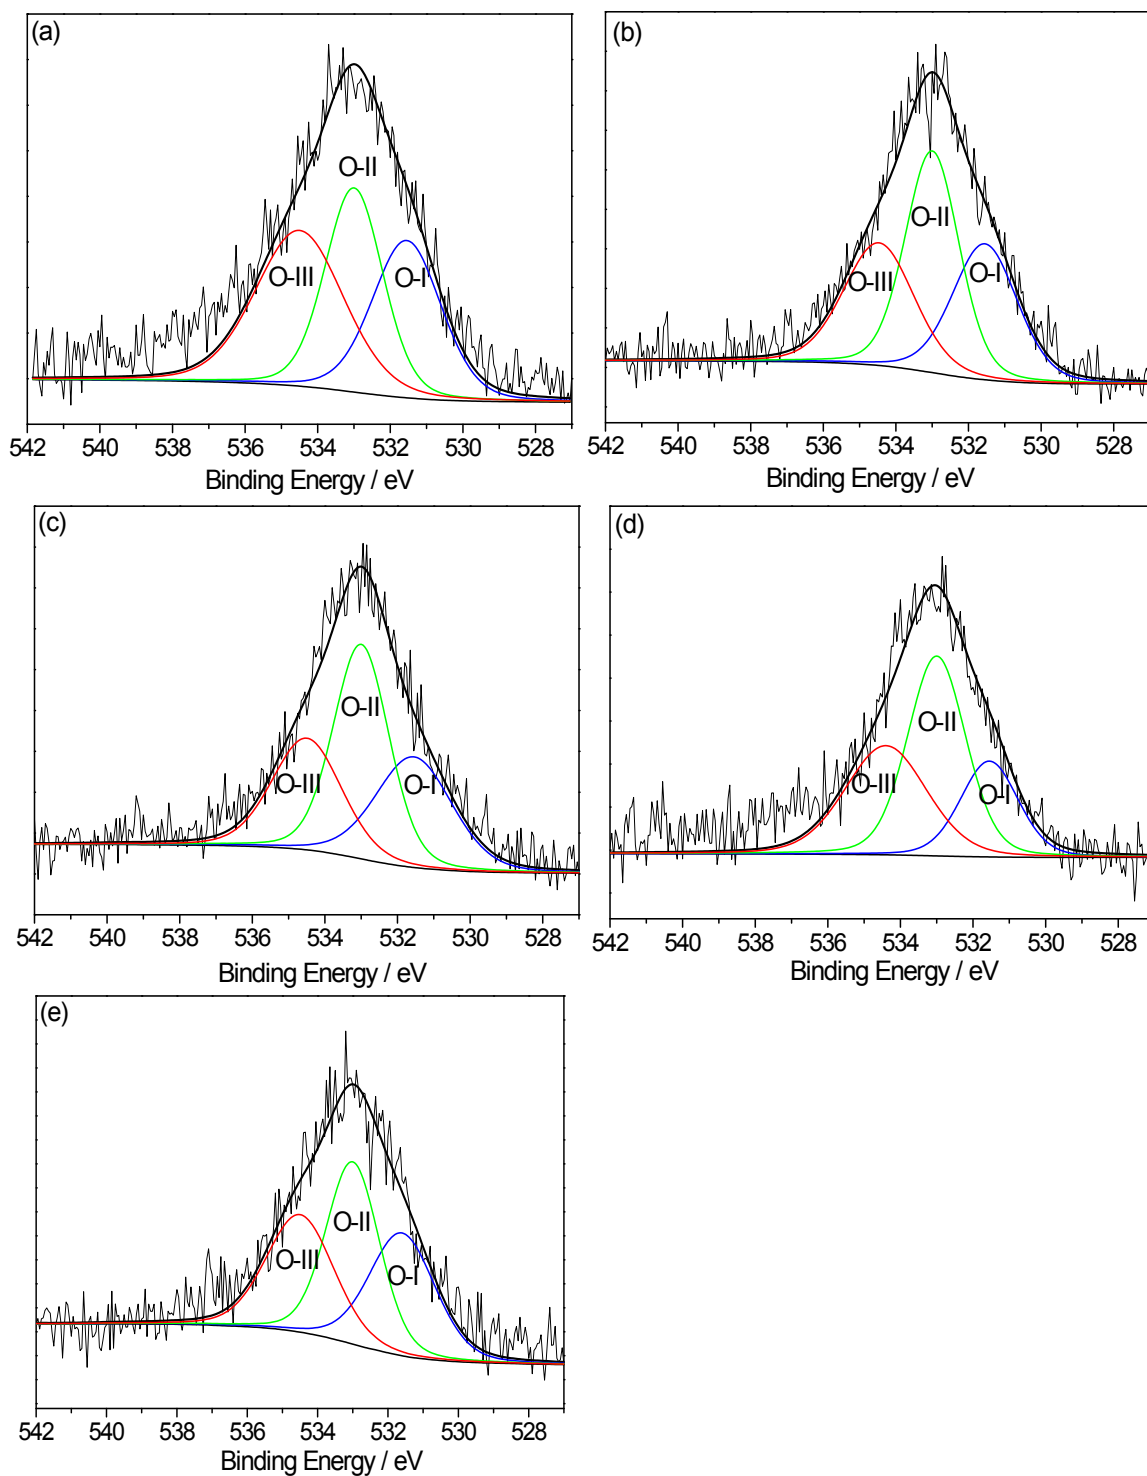

**Fig. S5.** O1s XPS spectra of pigskin-derived carbon sheets activated at different temperatures: PSAC-600 (a); PSAC-650 (b); PSAC-700 (c); PSAC-800 (d); PSAC-900 (e).

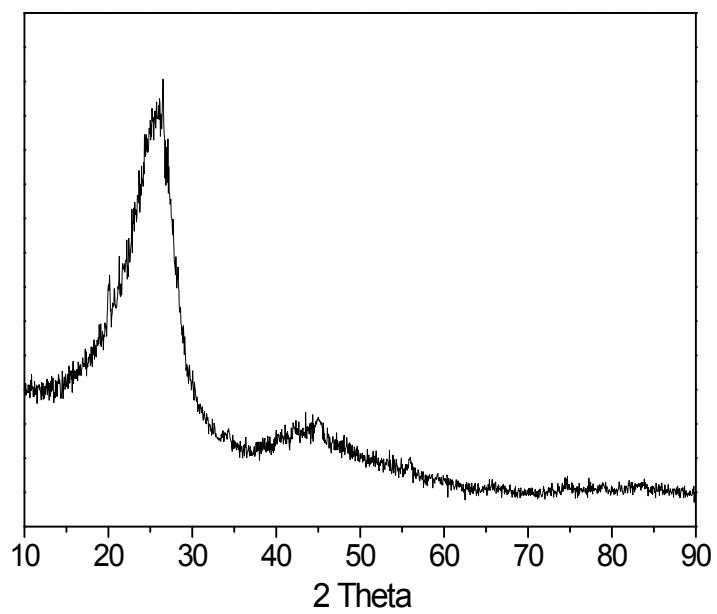

**Fig. S6.** XRD pattern of pigskin-derived carbon carbonized at 600 °C without KOH activation.

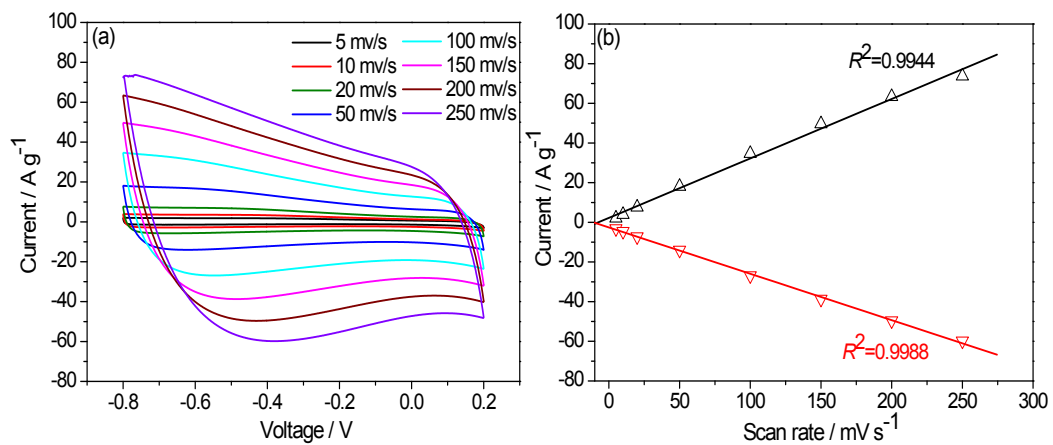

**Fig. S7.** Rate performance of pigskin-derived carbon sheets activated at 800 °C in 6 M KOH. (a) cyclic voltammety curves of PSAC-800 at various scan rates; (b) the relationship between the peak current and the scan rate for PSAC-800..

**Table S1** Pore structure parameters and capacitance of pigskin-derived carbon sheets activated at different temperatures.

| Sample   | $S_{\text{BET}}$<br>( $\text{m}^2 \text{g}^{-1}$ ) | $S_{\text{micro}}^{\text{a}}$<br>( $\text{m}^2 \text{g}^{-1}$ ) | $S_{0.6 < \text{micro} < 0.9 \text{ nm}}^{\text{b}}$<br>( $\text{m}^2 \text{g}^{-1}$ ) | $S_{\text{meso}}^{\text{c}}$<br>( $\text{m}^2 \text{g}^{-1}$ ) | $V_{\text{micro}}^{\text{d}}$<br>( $\text{cm}^3 \text{g}^{-1}$ ) | $V_{\text{meso}}^{\text{e}}$<br>( $\text{cm}^3 \text{g}^{-1}$ ) | $V_{\text{total}}^{\text{f}}$<br>( $\text{cm}^3 \text{g}^{-1}$ ) | $D_{\text{ave}}^{\text{g}}$<br>(nm) | $C^{\text{h}}$<br>( $\text{F g}^{-1}$ ) |
|----------|----------------------------------------------------|-----------------------------------------------------------------|----------------------------------------------------------------------------------------|----------------------------------------------------------------|------------------------------------------------------------------|-----------------------------------------------------------------|------------------------------------------------------------------|-------------------------------------|-----------------------------------------|
| PSAC-600 | 2209                                               | 1574                                                            | 811                                                                                    | 187                                                            | 0.79                                                             | 0.24                                                            | 1.20                                                             | 2.17                                | 547                                     |
| PSAC-650 | 2306                                               | 1556                                                            | 769                                                                                    | 205                                                            | 0.76                                                             | 0.26                                                            | 1.26                                                             | 2.18                                | 337                                     |
| PSAC-700 | 3147                                               | 1320                                                            | 227                                                                                    | 621                                                            | 0.68                                                             | 0.92                                                            | 1.85                                                             | 2.39                                | 347                                     |
| PSAC-800 | 3337                                               | 1283                                                            | 267                                                                                    | 764                                                            | 0.65                                                             | 1.17                                                            | 2.06                                                             | 2.51                                | 288                                     |
| PSAC-900 | 2713                                               | 1072                                                            | 211                                                                                    | 661                                                            | 0.52                                                             | 1.07                                                            | 1.81                                                             | 2.67                                | 225                                     |

<sup>a</sup> Surface area of micropores calculated by DFT method; <sup>b</sup> surface area of micropores between 0.6 and 0.9 nm by DFT method; <sup>c</sup> surface area of mesopores by DFT method; <sup>d</sup> pore volume of micropores by DFT method; <sup>e</sup> pore volume of mesopores by DFT method; <sup>f</sup> total pore volume; <sup>g</sup> average pore diameter; <sup>h</sup> capacitance at current load of 0.1 A  $\text{g}^{-1}$  in 6 M KOH.

**Table S2** Elemental analysis and surface elemental composition of pigskin-derived carbon sheets activated at different temperatures.

| Samples  | Elemental analysis (wt%) |       |      |       | XPS (at%) |       |       |   | at% of total N1s |      |      |      | at% of total O1s |      |       |
|----------|--------------------------|-------|------|-------|-----------|-------|-------|---|------------------|------|------|------|------------------|------|-------|
|          | N                        | C     | H    | S     | N         | C     | O     | S | N-6              | N-5  | N-Q  | N-X  | O-I              | O-II | O-III |
| PSAC-600 | 3.77                     | 84.61 | 1.73 | 0.047 | 2.96      | 84.77 | 12.28 | - | 0.82             | 1.09 | 0.62 | 0.43 | 3.67             | 3.98 | 4.63  |
| PSAC-650 | 3.07                     | 84.19 | 1.10 | 0.009 | 2.45      | 85.83 | 11.72 | - | 0.59             | 0.73 | 0.61 | 0.52 | 3.42             | 4.76 | 3.54  |
| PSAC-700 | 1.44                     | 92.92 | 0.92 | 0.079 | 1.42      | 88.07 | 10.52 | - | 0.37             | 0.35 | 0.33 | 0.37 | 3.16             | 4.46 | 2.89  |
| PSAC-800 | 0.80                     | 95.73 | 0.68 | 0.120 | 0.69      | 90.89 | 8.43  | - | 0.18             | 0.15 | 0.12 | 0.25 | 1.86             | 3.76 | 2.88  |
| PSAC-900 | 0.65                     | 95.90 | 0.77 | 0.087 | 0.65      | 90.96 | 8.39  | - | 0.18             | 0.13 | 0.15 | 0.19 | 1.26             | 1.52 | 1.24  |
